# Supplementary material for: Evaluating the Effectiveness of Designs for Low-Cost Digital Manufacturing Systems
Source: MDPI journal article supplement (doi:10.3390/app132312618), 2023-11-23
Supplement: s1 [file s1]

Archive with 1 entries (1 files):
- applsci-2664952-supplementary.pdf
